# Supplementary material
Source: MDPI journal article supplement (https://www.mdpi.com/2673-9976/6/1/50)
Supplement: s1 [file s1]

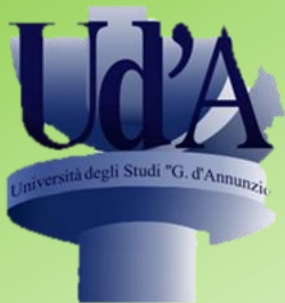

# Plant-derived peptides Rubiscolin-6, Soymorphin-6 and their C-terminal amide derivatives: pharmacokinetic properties and biological activity

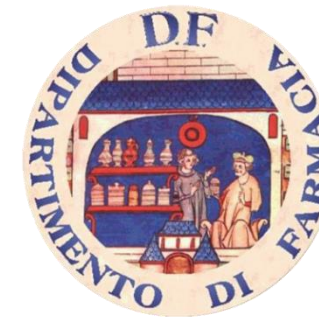

**Foods  
2021**

**The 2nd International Electronic Conference on Foods  
Future Foods and Food Technologies for a Sustainable World**

15–30 OCTOBER 2021 | ONLINE

*Azzurra Stefanucci, Ph.D*

*Department of Pharmacy, University “G. d’Annunzio”*

*Chieti-Pescara*

*Via dei Vestini 31, 66100 Chieti, Italy.*

*[a.stefanucci@unich.it](mailto:a.stefanucci@unich.it)*

 *foods*

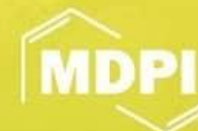

# EXORPHINS

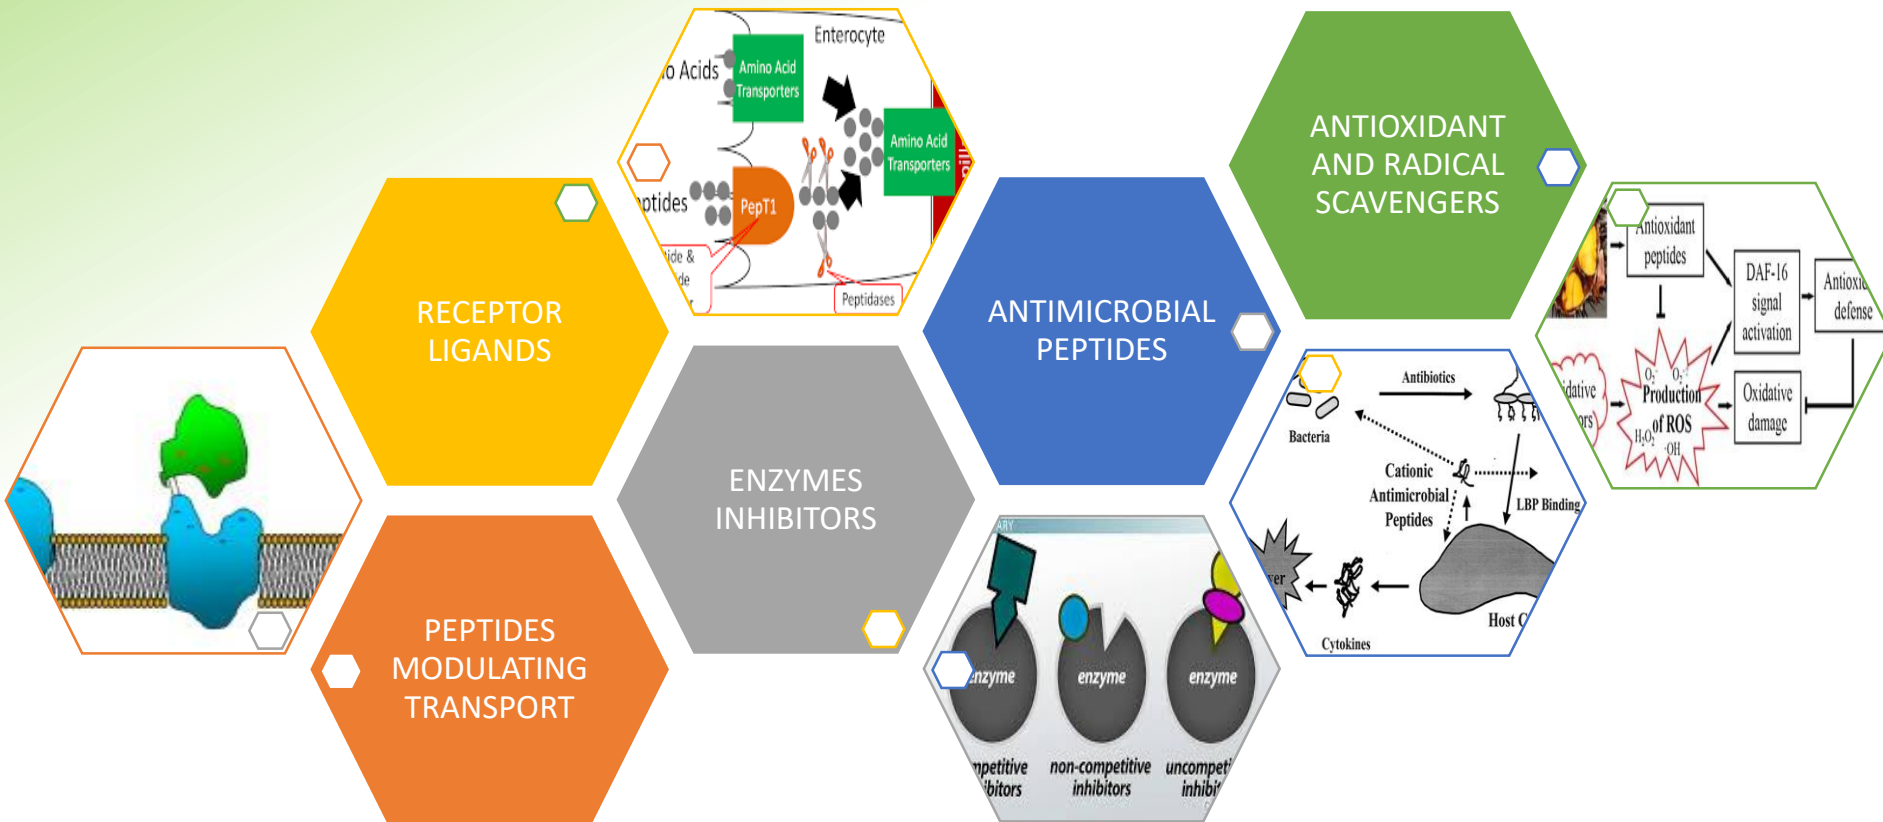

# THE ORIGIN OF SOYMORPHINS AND RUBISCOLINS

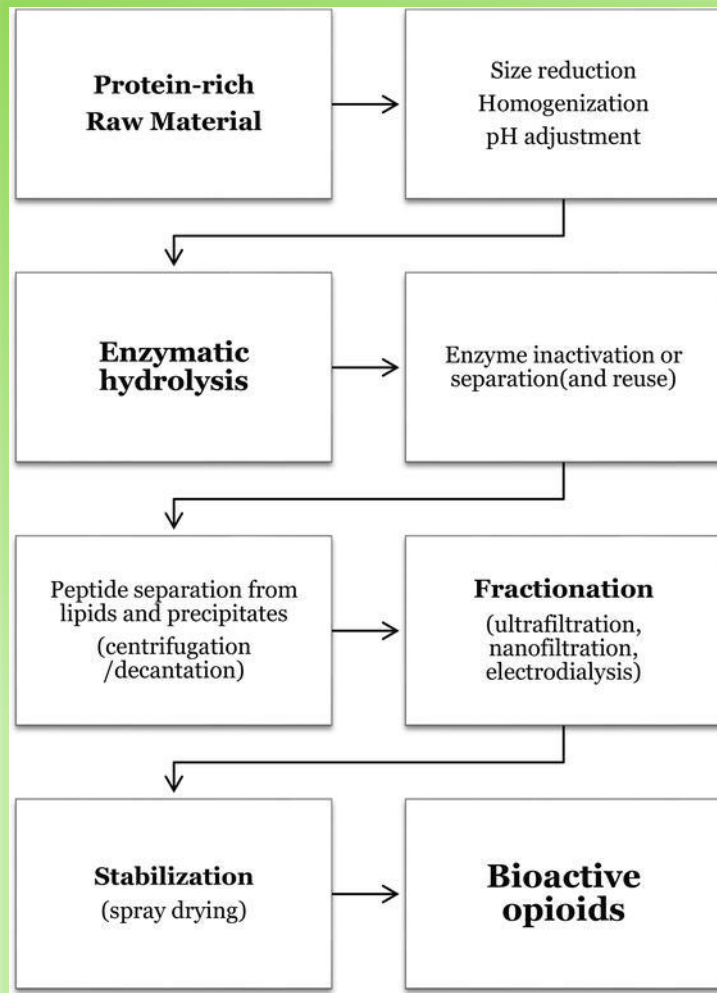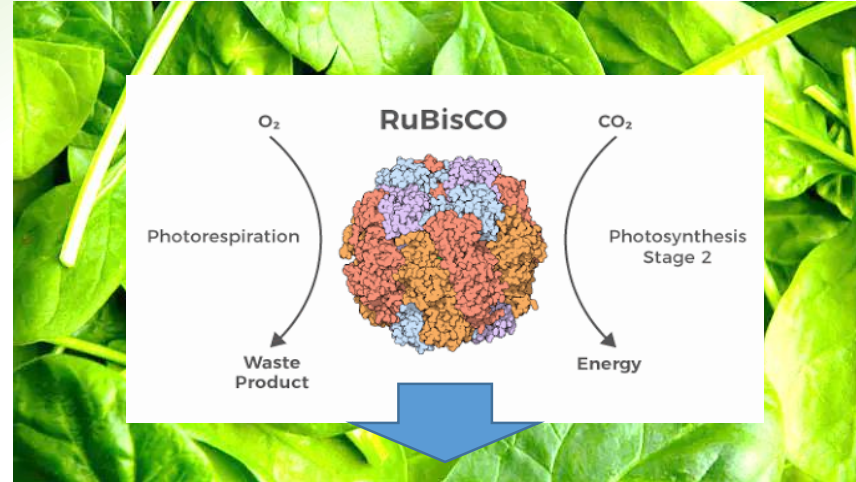

Rubiscolin-6: **YPLDLF**

*δ-opioid receptor ligand*

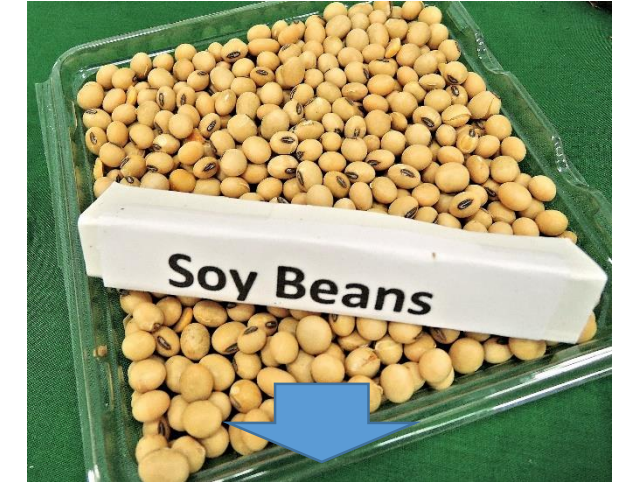

Soymorphin-6: **YPFVVN**

*μ-opioid receptor ligand*

# BIOLOGICAL ACTIVITIES OF EXORPHINS

|                                |                         |
|--------------------------------|-------------------------|
| <b>SOYMORPHIN-6</b>            | <b>RUBISCOLIN-6</b>     |
| <b>MOR agonist</b>             | <b>DOR agonist</b>      |
| <b>Anxiolytic activity</b>     |                         |
| <b>Anti-nociceptive effect</b> |                         |
| Anorexygenic effect            | Orexygenic effect       |
|                                | Memory-enhancing effect |

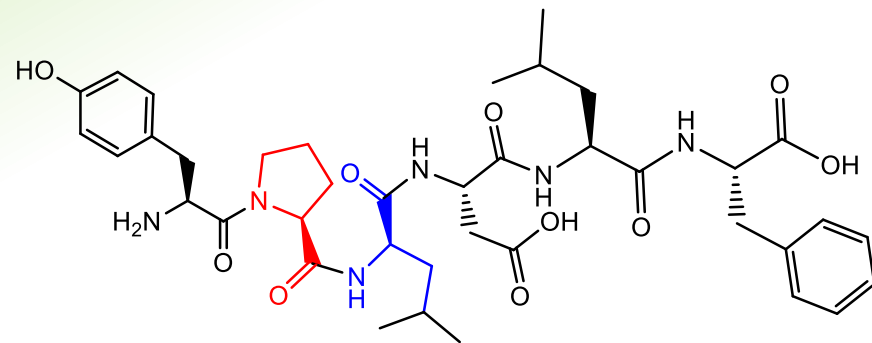

**RUBISCOLIN-6**

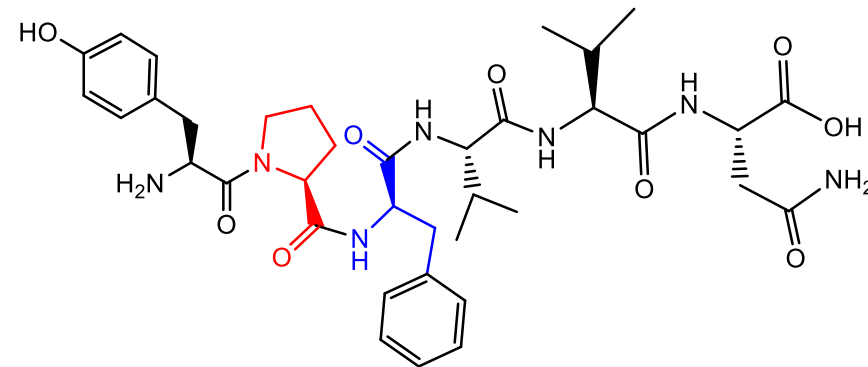

**SOYMORPHIN-6**



# AIM AND SCOPE

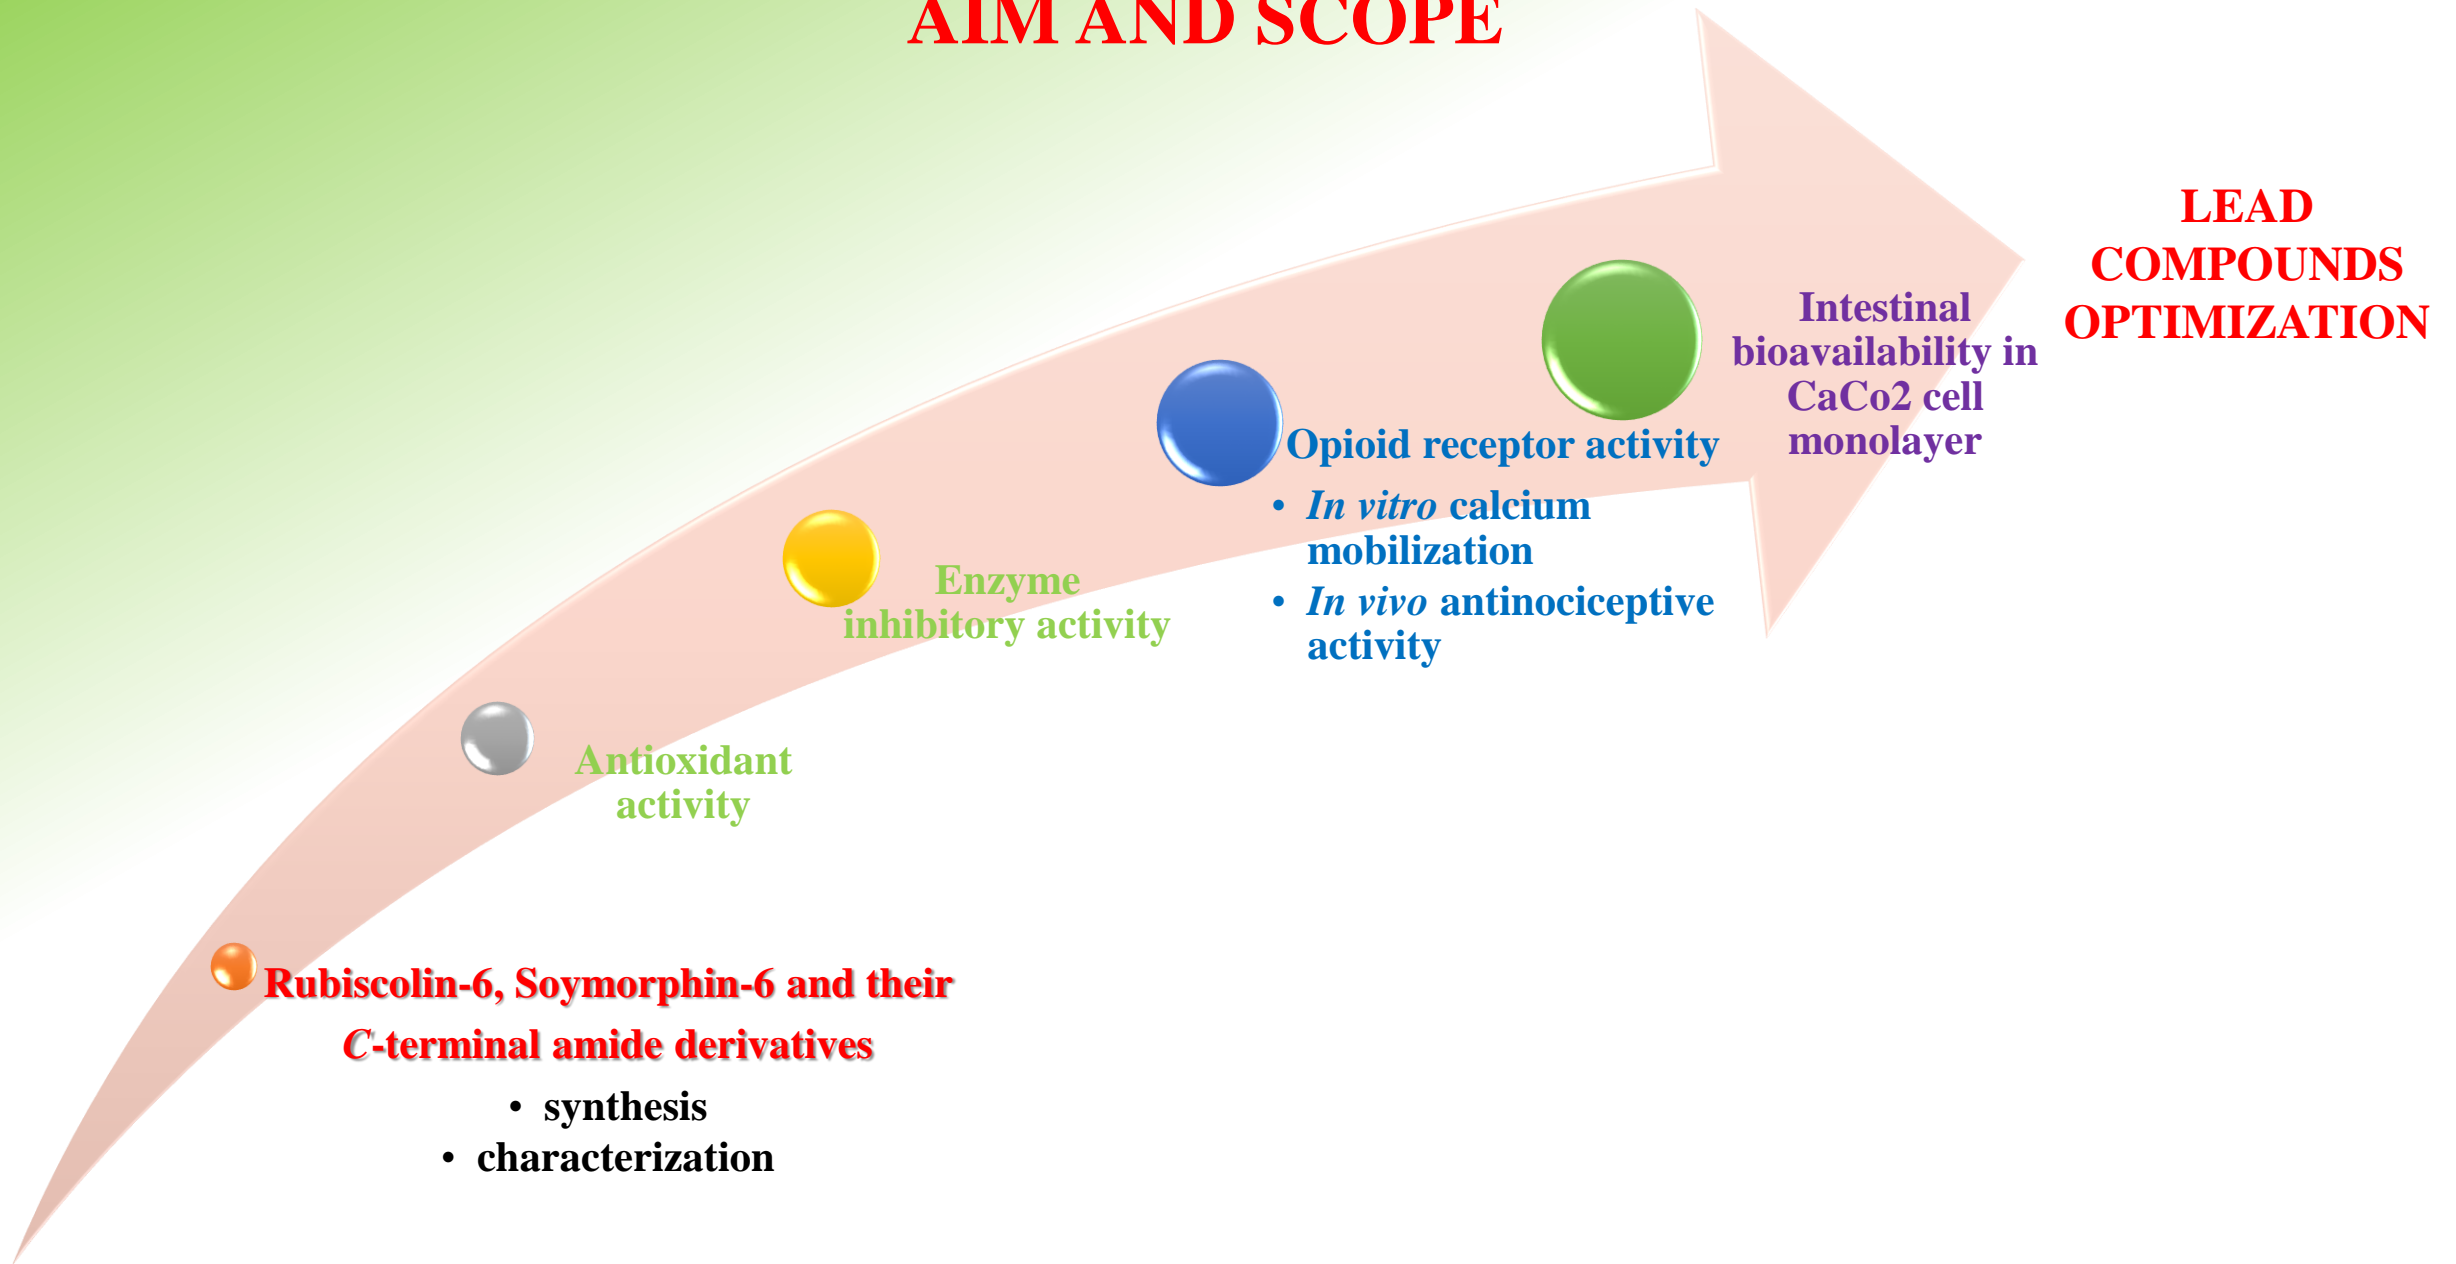

# ANTIOXIDANT AND TYROSINASE INHIBITORY ACTIVITIES

| Peptides                    | DPPH (mg TE/g)         | ABTS (mg TE/g)          | CUPRAC (mg TE/g)        | FRAP (mg TE/g)         | Tyrosinase inhibition (mg KAE/g) |
|-----------------------------|------------------------|-------------------------|-------------------------|------------------------|----------------------------------|
| <b>Rubiscolin-6</b>         | 2.41±0.33 <sup>a</sup> | 8.86±0.38 <sup>b</sup>  | 10.09±0.02 <sup>a</sup> | 5.75±0.04 <sup>a</sup> | 24.51±1.99 <sup>a</sup>          |
| <b>Soymorphin-6</b>         | 2.65±0.70 <sup>a</sup> | 3.09±0.47 <sup>c</sup>  | 9.10±0.08 <sup>b</sup>  | 5.64±0.04 <sup>b</sup> | na                               |
| <b>Rubiscolin-6 C-amide</b> | 2.72±0.51 <sup>a</sup> | 0.77±0.01 <sup>d</sup>  | 9.55±0.05 <sup>c</sup>  | 5.79±0.03 <sup>a</sup> | 2.81±0.34 <sup>c</sup>           |
| <b>Soymorphin-6 C-amide</b> | 1.38±0.21 <sup>b</sup> | 11.00±1.96 <sup>a</sup> | 9.35±0.13 <sup>c</sup>  | 5.72±0.08 <sup>a</sup> | 9.19±1.43 <sup>b</sup>           |

**Table 1.** Antioxidant properties and tyrosinase inhibitory effects of the tested peptides\*

\*Values are reported as mean ±S.D of three parallel experiments. TE: Trolox equivalents; KAE: Kojic acid equivalents; na: not active. a-d: Different letters indicate significant differences in the peptides ( $p < 0.05$ ).

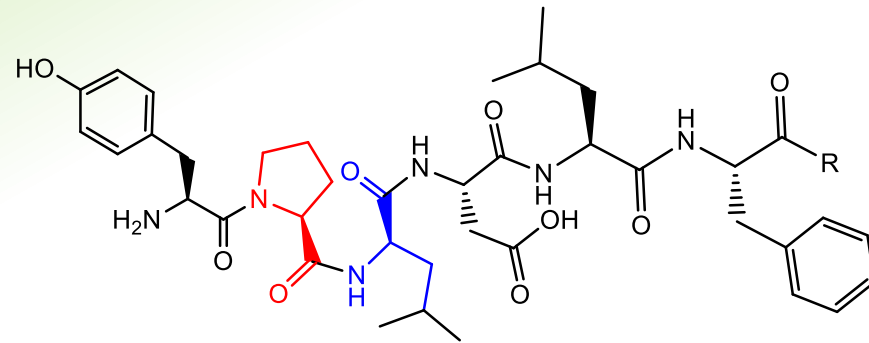

**R=OH: RUBISCOLIN-6**  
**R=NH<sub>2</sub>: RUBISCOLIN-6 C-AMIDE**

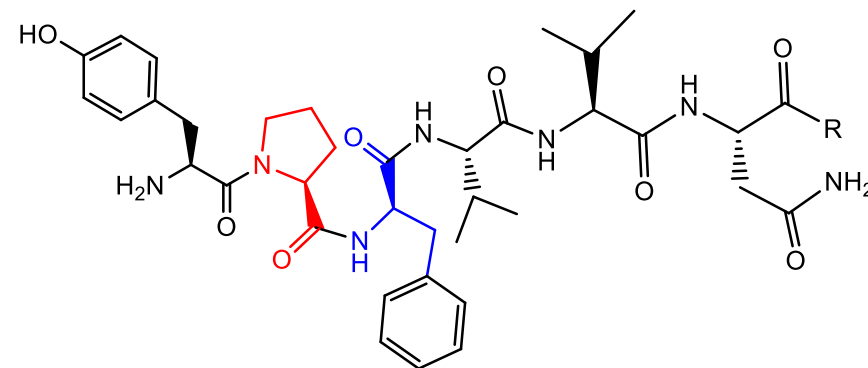

**R=OH: SOYMORPHIN-6**  
**R=NH<sub>2</sub>: SOYMORPHIN-6 C-AMIDE**

# IN VITRO AND IN VIVO ACTIVITY ON OPIOID RECEPTORS

| COMPOUNDS            | CHO <sub>μ</sub>                          |                             | CHO <sub>δ</sub>                          |                             |
|----------------------|-------------------------------------------|-----------------------------|-------------------------------------------|-----------------------------|
|                      | pEC <sub>50</sub><br>(CL <sub>95%</sub> ) | E <sub>max</sub> ± sem<br>% | pEC <sub>50</sub><br>(CL <sub>95%</sub> ) | E <sub>max</sub> ± sem<br>% |
| Dermorphin           | 8.06<br>(7.65 – 8.46)                     | 254 ± 18%                   | 6.43<br>(5.95 – 6.91) <sup>a</sup>        | 78 ± 3% <sup>a</sup>        |
| DPDPE                | Inactive                                  |                             | 7.51<br>(7.31 – 7.70)                     | 223 ± 17%                   |
| EM-1                 | 7.45<br>(7.08 – 7.82)                     | 263 ± 30%                   | Crc incomplete,<br>at 100μM 89 ± 15%      |                             |
| Rubiscolin-6         | Inactive                                  |                             | Crc incomplete,<br>at 100μM 87 ± 19%      |                             |
| Rubiscolin-6 C-amide | Crc incomplete,<br>at 100μM 131 ± 29%     |                             | Crc incomplete,<br>at 100μM 112 ± 29%     |                             |
| Soymorphin-6         | Crc incomplete,<br>at 100μM 110 ± 13%     |                             | Crc incomplete,<br>at 100μM 46 ± 14%      |                             |
| Soymorphin-6 C-amide | Crc incomplete,<br>at 100μM 81 ± 4%       |                             | Crc incomplete,<br>at 100μM 79 ± 14%      |                             |

**Table 2.** Potencies (pEC<sub>50</sub>) and maximal effects of standard and novel ligands at μ and δ-opioid receptors.

Data are mean of at least 5 separate experiments made in duplicate.

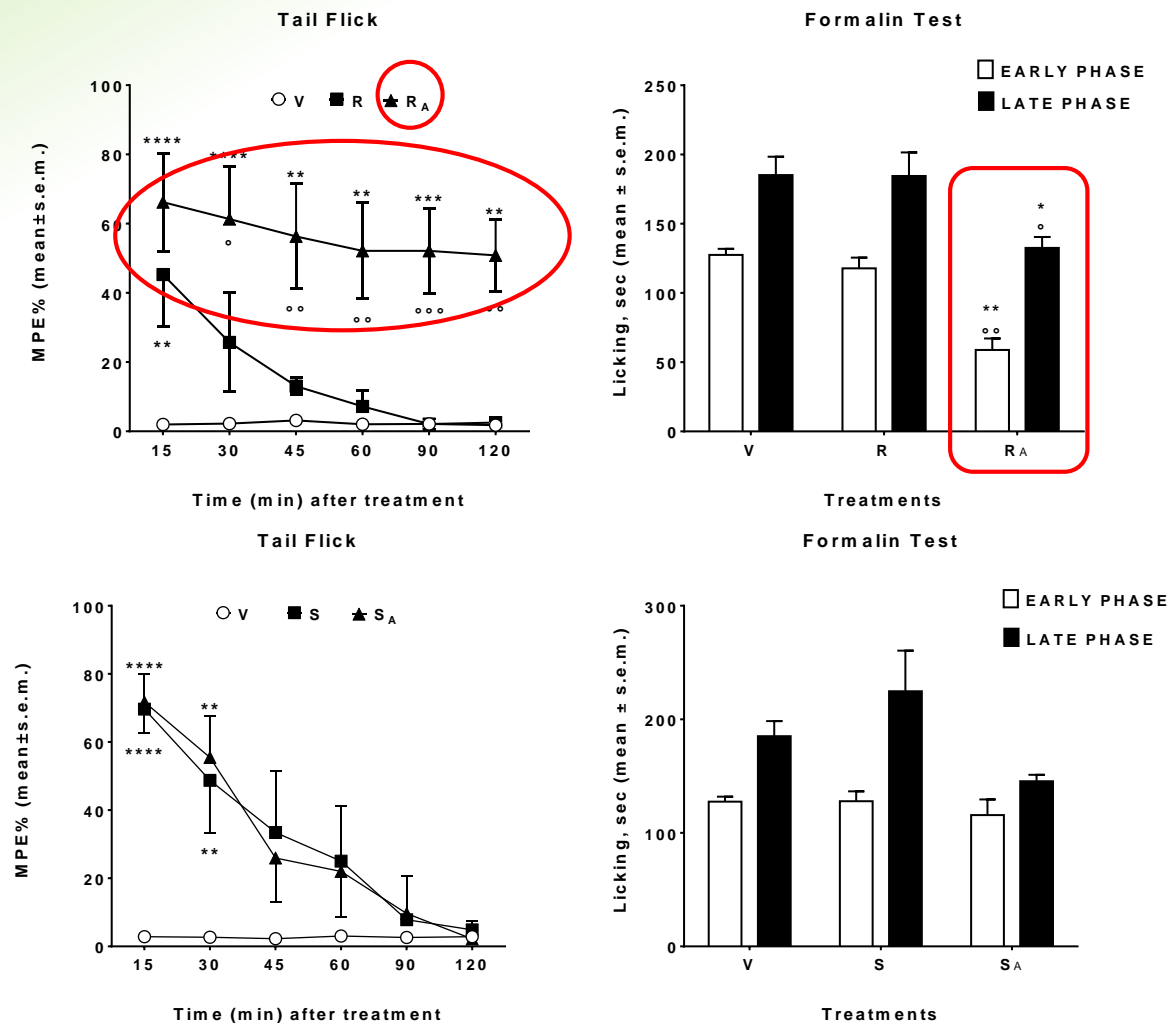

**Figure 1.** Effects induced by Rubiscolin-6 (R), Rubiscolin-6 C-amide (R<sub>A</sub>), Soymorphin-6 (S), Soymorphin-6 C-amide (S<sub>A</sub>) in the tail flick test (left panel) and in the formalin test (right panel). In the tail flick test, compounds were administered i.c.v. at the dose of 10 μg/10 μL; in the formalin test, compounds were administered s.c., in the dorsal surface of the mouse hind paw, at the dose of 100 μg/20 μL, 15 min before formalin. V is for vehicle-treated animals. \*\* is for P<0.01, \*\*\* is for P<0.001, \*\*\*\* is for P<0.0001 vs V; ° is for P<0.05, °° is for P<0.01, °°° is for P<0.001 vs R. N=7.

# IN VITRO INTESTINAL BIOACCESSIBILITY

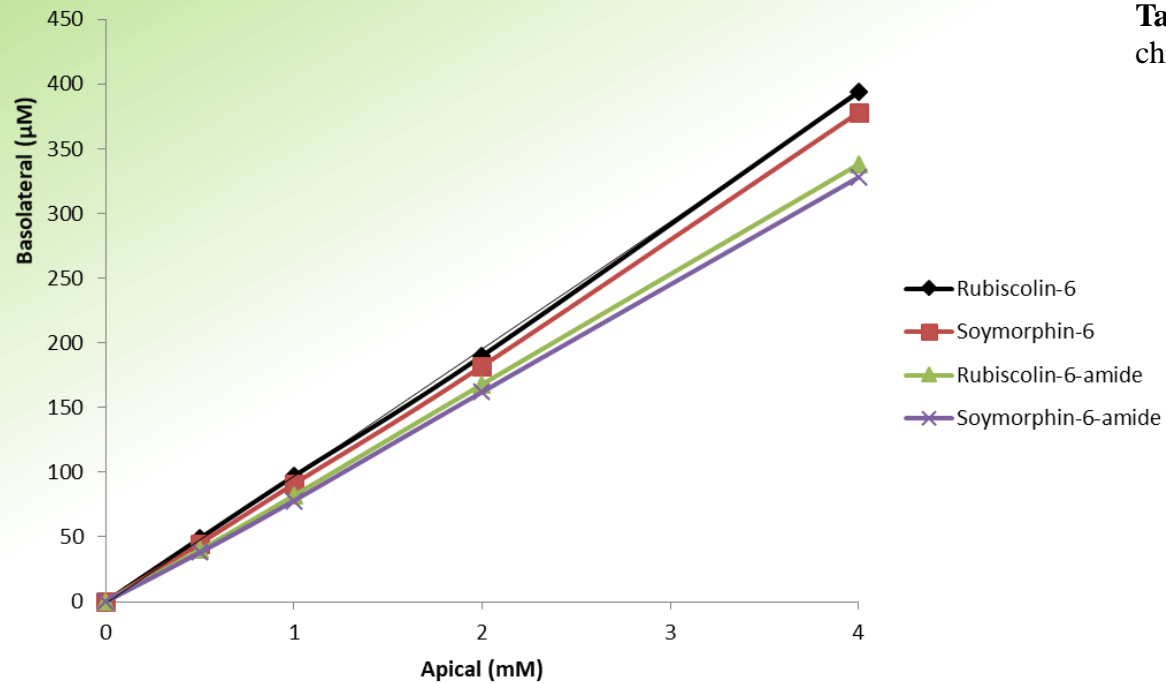

**Figure 2.** *In vitro* intestinal bioavailability of peptides. Quantification of peptides in CaCo2 cell monolayer apical and basolateral solutions using a five-point calibration curve of pure peptides as standard analysed by HPLC.

| Peptide                     | %          |
|-----------------------------|------------|
| <b>Rubiscolin-6</b>         | 10.2 ± 1.2 |
| <b>Soymorphin-6</b>         | 7.3 ± 0.8  |
| <b>Rubiscolin-6 C-amide</b> | 5.4 ± 0.4  |
| <b>Soymorphin-6 C-amide</b> | 3.2 ± 0.3  |

Values are the means ± SD ( $n = 5$ ;  $P < 0.01$ ).

**Table 3.** *In vitro* intestinal bioaccessibility of peptides calculated as area under curve of chromatograms from HPLC-DAD analyses of intestinal digesta.



# DOCKING STUDY

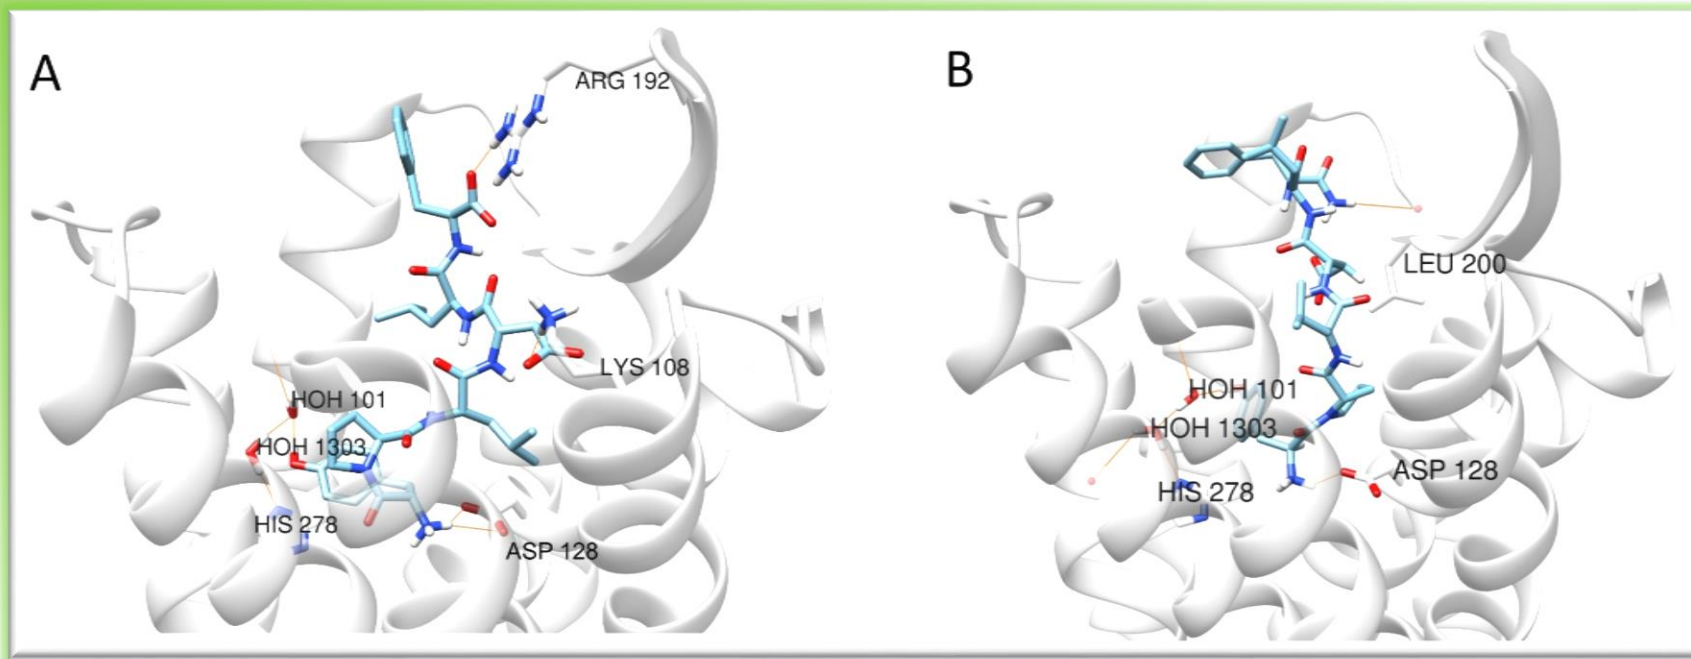

**Figure 3.** Best ranked docking poses of **Rubiscolin-6 (A)** and **Rubiscolin-6 C-amide (B)** docked at the DOR (4RWD).

| Compounds                   | DOR interactions |                              |               |        |            |
|-----------------------------|------------------|------------------------------|---------------|--------|------------|
|                             | Asp128           | His278                       | Trp284        | Leu200 | Arg192     |
| <b>TIPP-NH<sub>2</sub></b>  | H bond           | H bond through water network | $\pi$ - $\pi$ | H bond | Cat- $\pi$ |
| <b>Rubiscolin-6</b>         | Ionic + H bond   | H bond through water network | --            | --     | H bond     |
| <b>Rubiscolin-6 C-amide</b> | Ionic + H bond   | H bond through water network | --            | H bond | --         |

# CONCLUSION

The tested peptides exhibit low antioxidant ability.

All our peptides exhibit moderate tyrosinase inhibitory effect.

Calcium mobilization assay data reveal that all compounds are able to stimulate the DOR and MOR at 100  $\mu$ M concentration.

Rubiscolin-6 C-amide centrally administered demonstrates a strong antinociceptive effect higher than the parent compound, and it is effective after subcutaneous administration.

All peptides were absorbed intact through CaCo2 monolayer however, rubiscolin-6 C-amide shows the most interesting *in vivo* biological profile, which prompt us to further investigate its effect after oral administration.

# FUTURE PERSPECTIVES

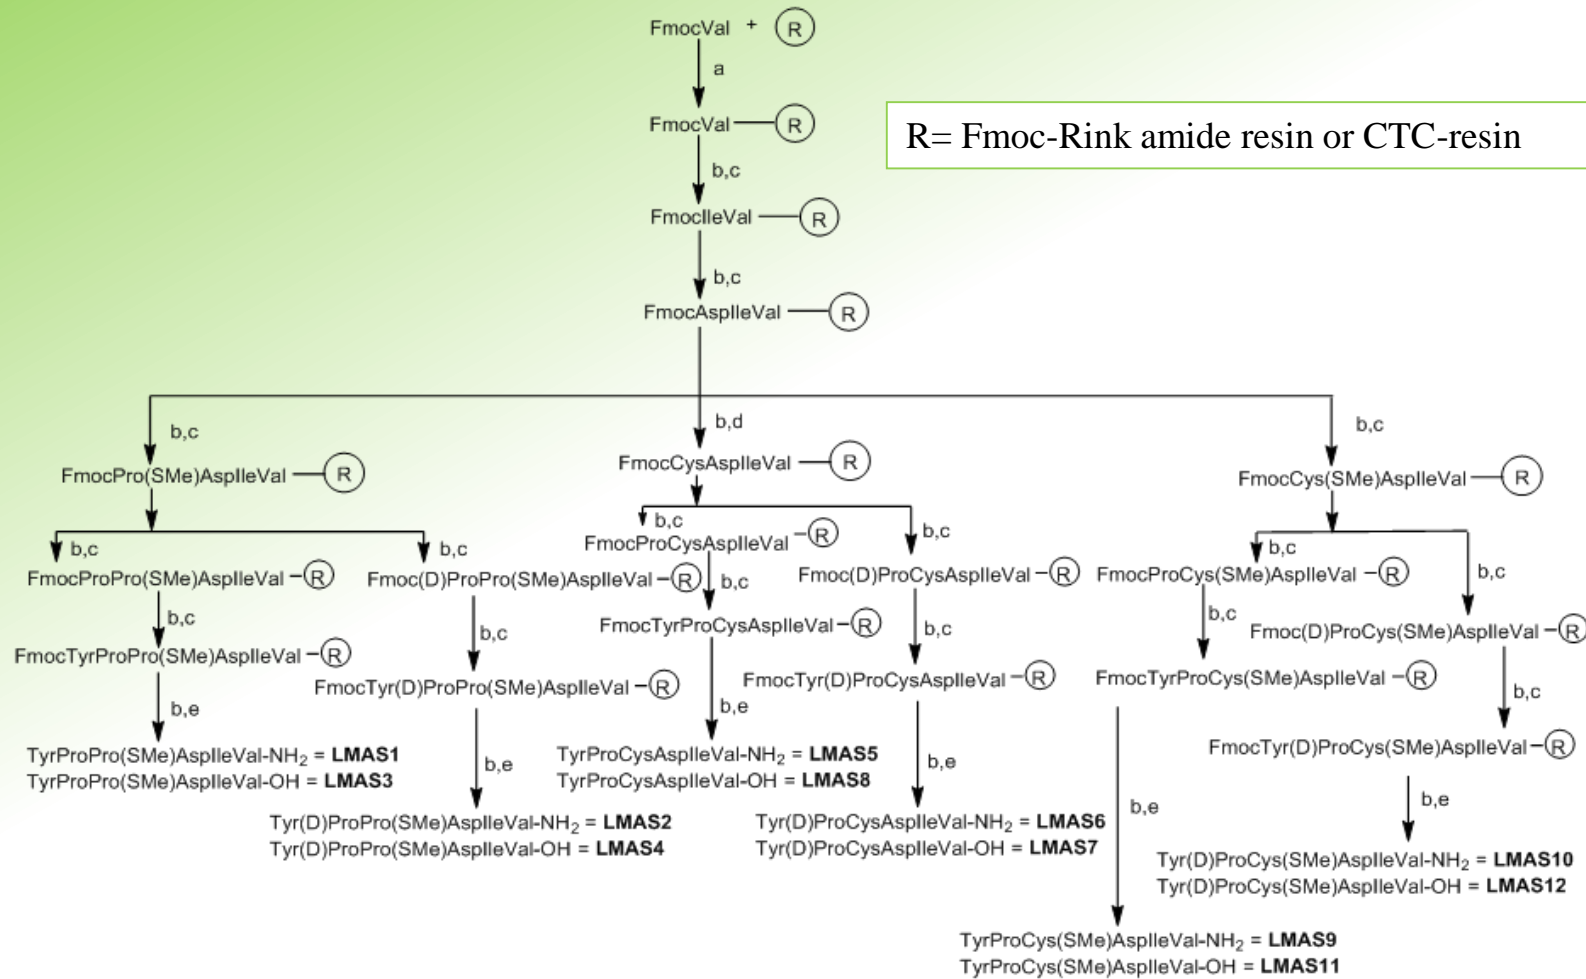

*Reagents and conditions:* (a) Fmoc-Rink-Amide resin: Piperidine 20% in DMF (15min x2); FmocValOH, HOBt, DIPEA, TBTU, DMF. Resina CTC: FmocValOH, HOBt, DIPEA, TBTU, DMF; then DCM/MeOH/DIPEA 17:2:1; (b) Piperidine 20% in DMF (15min x2); (c) FmocXaaOH, HOBt, DIPEA, TBTU, DMF (Xaa = Ile, Asp, Pro/Met, Cys(SMe), Pro, (D)Pro, Tyr); (d) FmocCys(Trt)OH, DMF, TBTU, Collidine; (e) TFA/H<sub>2</sub>O/TES or TFA/H<sub>2</sub>O/TIPS 95:2.5:2.5.

# ACKNOWLEDGEMENTS

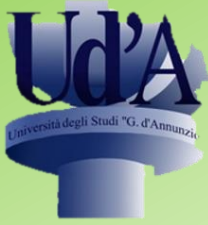

Prof. Adriano Mollica  
Dr. Alice Della Valle  
Dr. Giuseppe Scioli  
Prof. Angelo Cichelli

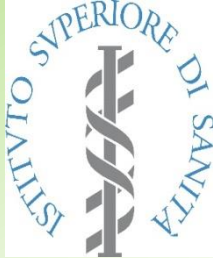

Dr. Stefano Pieretti  
Dr. Paola Minosi

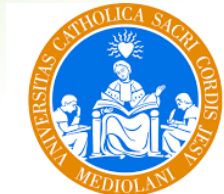

UNIVERSITÀ  
CATTOLICA  
del Sacro Cuore

Prof. Ettore Novellino

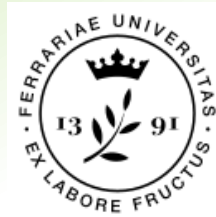

Università  
degli Studi  
di Ferrara

Prof. Girolamo Calò  
Dr.ssa Chiara Sturaro

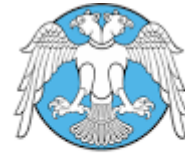

SELÇUK  
ÜNİVERSİTESİ

Prof. Gokhan Zengin  
Dr. Sengul Uysal  
Dr. Ramazan Ceylan

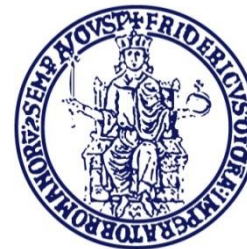

Prof. Giancarlo Tenore
